# Supplementary material
Source: PubMed Central journal article supplement (PMC8787869)
Supplement: NIHMS1771374-supplement-1.pdf [file NIHMS1771374-supplement-1.pdf]

## Supplementary Tables

**Supplementary Table 1**

*Intercorrelations Among Key Study Variables at Baseline for EAS and MAP/MARS*

| Variable                                | 1               | 2              | 3              | 4              | 5              | 6               | MAP/MARS<br><i>M (SD)</i> |
|-----------------------------------------|-----------------|----------------|----------------|----------------|----------------|-----------------|---------------------------|
| 1. Age                                  | -               | .010           | -.044**        | .015           | .007           | -.309***        | 78.65<br>(7.26)           |
| 2. Income (c.)                          | -.087***        | -              | .316***        | -.167***       | .043           | .117***         | 0.48<br>(0.72)            |
| 3. Education (c.)                       | -.068***        | .373***        | -              | -.132***       | .023           | .177***         | 1.10<br>(0.95)            |
| 4. Depressive<br>Symptoms               | .067**          | -.176***       | -.166***       | -              | .071***        | -.113***        | 1.11<br>(1.57)            |
| 5. Subjective Cognitive<br>Decline (c.) | .041            | .008           | .028           | .173***        | -              | -.050**         | 0.77<br>(0.42)            |
| 6. Objective Memory                     | -.075**         | .121***        | .114***        | -.009          | -.066**        | -               | 22.60<br>(6.17)           |
| <b>EAS</b><br><b><i>M (SD)</i></b>      | 78.09<br>(5.34) | 0.11<br>(0.76) | 0.57<br>(1.12) | 2.38<br>(2.35) | 0.20<br>(0.40) | 47.44<br>(2.37) |                           |

*Note.* Correlations for the EAS dataset are listed below the diagonal and for the MAP/MARS dataset are listed above the diagonal. Coefficients from the two studies are presented together for ease of presentation and comparison. (c.) = categorical variable. Kendall Tau coefficients used for associations with categorical variables, Pearson coefficients used for continuous outcomes.

\*\*\*  $p \leq .001$ . \*\*  $p \leq .01$ .

**Supplementary Table 2**

*Inter-correlations among Key Study Variables at Baseline for HRS and NHATS*

| <b>Variable</b>                      | <b>1</b> | <b>2</b> | <b>3</b> | <b>4</b> | <b>5</b> | <b>6</b> | <b>NHATS<br/>M (SD)</b> |
|--------------------------------------|----------|----------|----------|----------|----------|----------|-------------------------|
| 1. Age                               | -        | -.120*** | -.094*** | .008     | .059***  | -.342*** | 1.84<br>(1.48)          |
| 2. Income (c.)                       | -.195*** | -        | .210**   | -.087*** | -.049**  | .130***  | -0.20<br>(0.91)         |
| 3. Education (c.)                    | -.087*** | .322***  | -        | -.140*** | -.025    | .236***  | 0.60<br>(1.05)          |
| 4. Depressive Symptoms               | .101***  | -.211*** | -.176*** | -        | .175***  | -.123*** | 2.85<br>(1.28)          |
| 5. Subjective Cognitive Decline (c.) | .009     | -.020**  | -.005    | .158***  | -        | -.085*** | 0.12<br>(0.32)          |
| 6. Objective Memory                  | -.324*** | .178***  | .222***  | -.138*** | -.059*** | -        | 8.49<br>(3.11)          |

|               |        |        |        |        |        |        |
|---------------|--------|--------|--------|--------|--------|--------|
| <b>HRS</b>    | 70.27  | 0.37   | 0.34   | 1.37   | 0.20   | 10.05  |
| <b>M (SD)</b> | (6.48) | (0.77) | (1.06) | (1.80) | (0.40) | (3.35) |

*Note.* Correlations for HRS dataset are listed below the diagonal and for NHATS dataset are listed above the diagonal. Coefficients from the two studies are presented together for ease of presentation and comparison. (c.) = categorical variable. Kendall Tau coefficients used for associations with categorical variables, Pearson coefficients used for continuous outcomes.

\*\*\*  $p \leq .001$ . \*\*  $p \leq .01$ .
